# Supplementary material for: Regulation of FSH Synthesis by Differentially Expressed miR-488 in Anterior Adenohypophyseal Cells
Source: MDPI journal article supplement (doi:10.3390/ani11113262), 2021-11-15
Supplement: s1 [file s1]

**Supplementary Materials:**

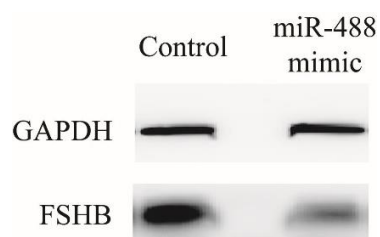

**Figure S1.** FSHB protein expression after transfection with miR-488 mimic.

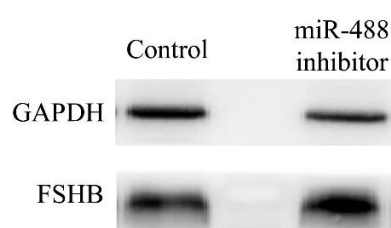

**Figure S2.** FSHB protein expression after transfection with miR-488 inhibitor.

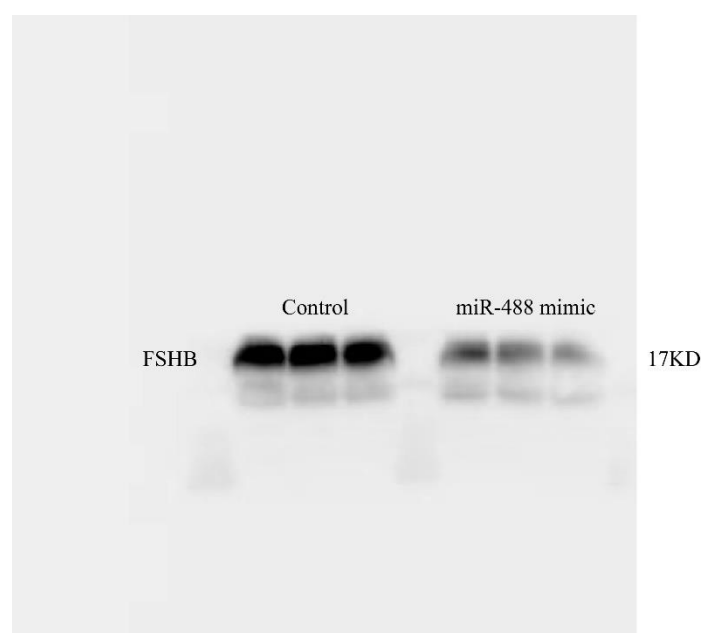

**Figure S3.** Original figure of FSHB protein after transfection with miR-488 mimic.

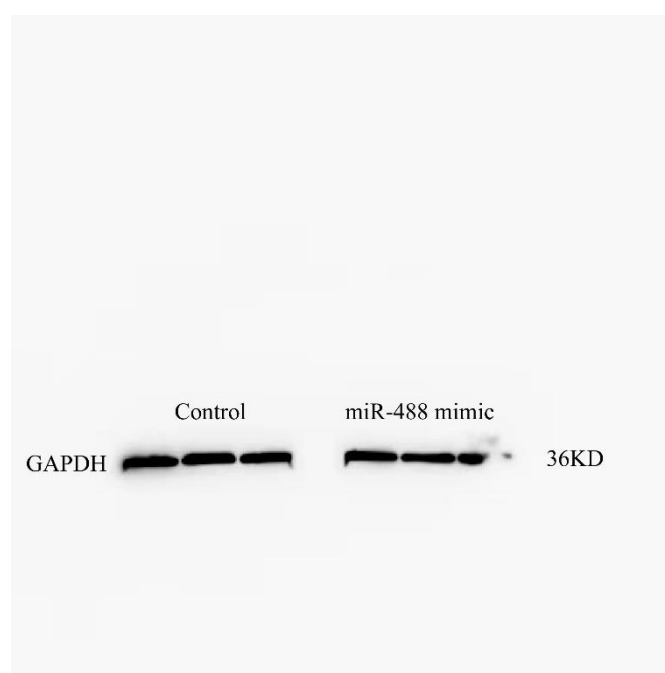

**Figure S4.** Original figure of GAPDH protein after transfection with miR-488 mimic.jpg.

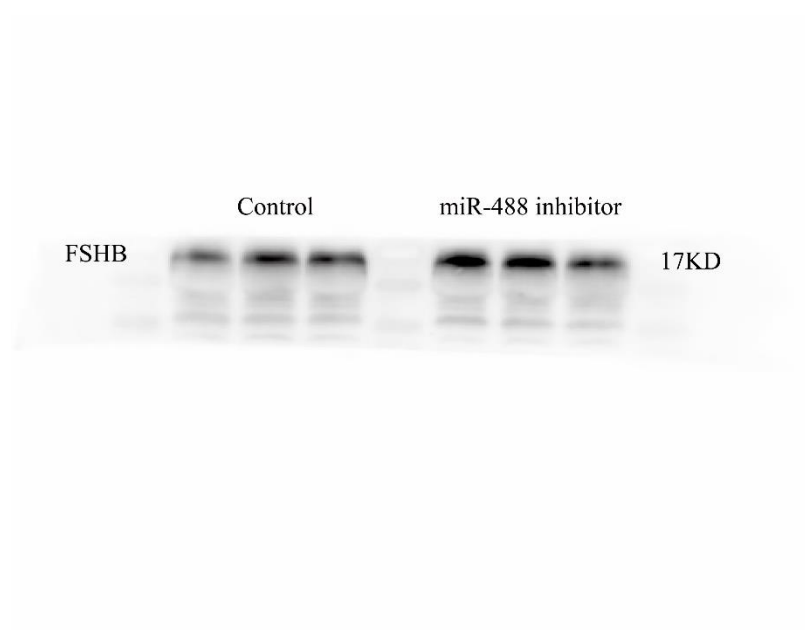

**Figure S5.** Original figure of FSHB protein after transfection with miR-488 inhibitor.

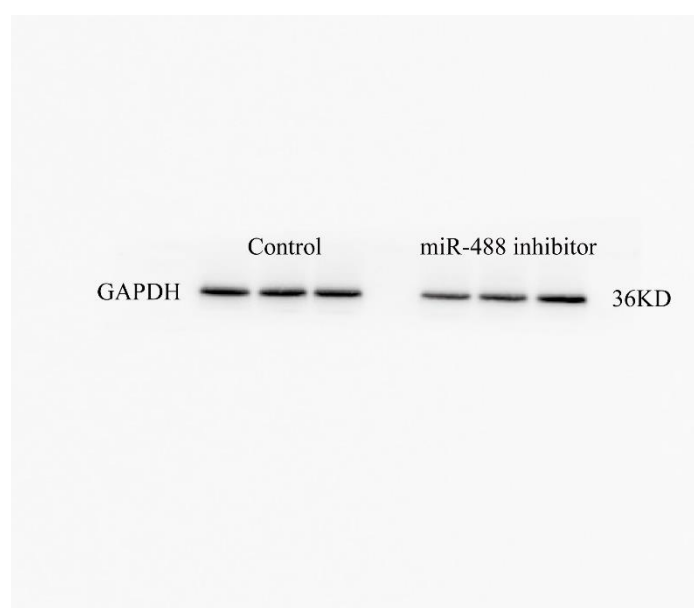

**Figure S6.** Original figure of GAPDH protein after transfection with miR-488 inhibitor.

**Table S1.** Raw data obtained from grayscale analysis.

|                   | <b>GAPDH</b> | <b>FSHB</b> | <b>FSHB/GAPDH</b> |
|-------------------|--------------|-------------|-------------------|
| control           | 32523.945    | 14918.137   | 0.458681657       |
| miR-488 mimic     | 27432.744    | 10786.472   | 0.393196977       |
|                   | <b>GAPDH</b> | <b>FSHB</b> | <b>FSHB/GAPDH</b> |
| control           | 30087.116    | 28258.693   | 0.939229037       |
| miR-488 inhibitor | 29359.572    | 29806.288   | 1.015215344       |
